# Supplementary material for: Impact of Incorporating Free Calcium and Magnesium on the Heat Stability of a Dairy- and Soy-Protein-Containing Model Emulsion
Source: MDPI journal article supplement (doi:10.3390/polym15224424), 2023-11-16
Supplement: s1 [file s1]

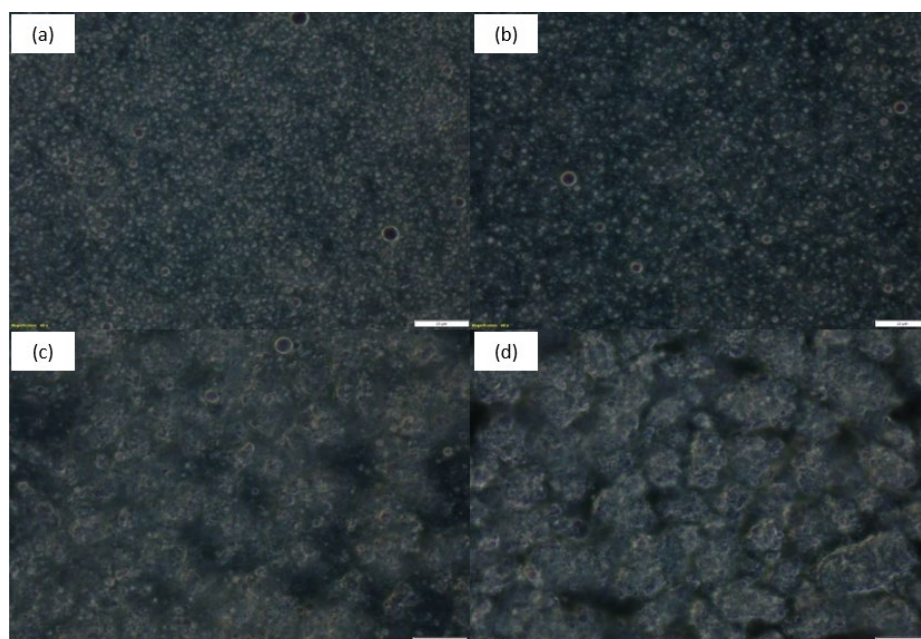

**Figure S1.** Microscopy of samples with different dose of  $\text{CaCl}_2$  addition (a) 2mM (b) 3.5mM (c) 5mM (d) 6.5mM.

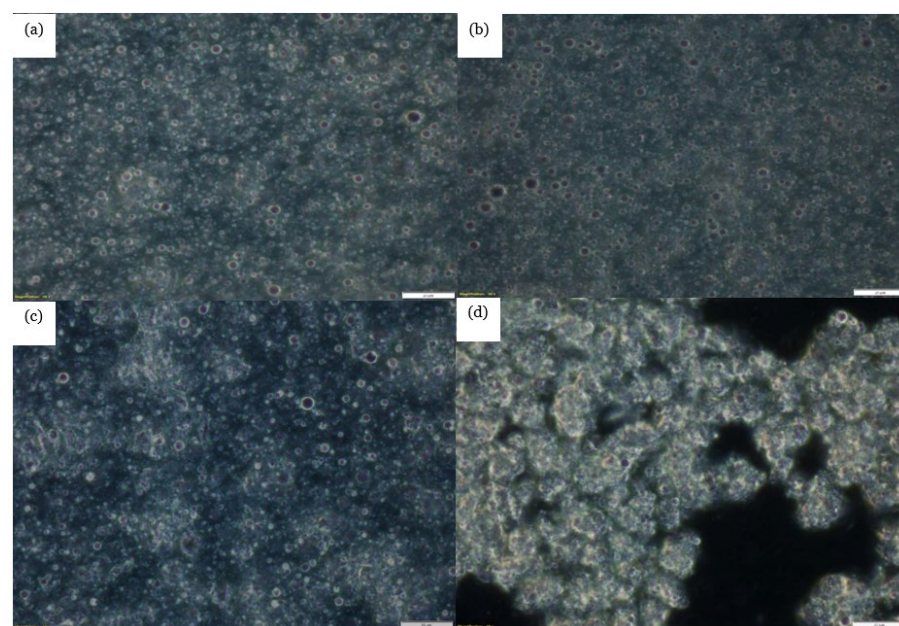

**Figure S2.** Microscopy of samples with different dose of  $\text{MgCl}_2$  addition (a) 2mM (b) 3.5mM (c) 5mM (d) 6.5mM.
